# Supplementary material for: A framework for the use of single-chemical transcriptomics data in predicting the hazards associated with complex mixtures of polycyclic aromatic hydrocarbons
Source: PubMed Central journal article supplement (PMC5489644; doi:10.1007/s00204-016-1891-8), 2016-11-17

**Online Resource 5.** Impact of no statistical filtering on mixture predictions using mathematical models of additivity

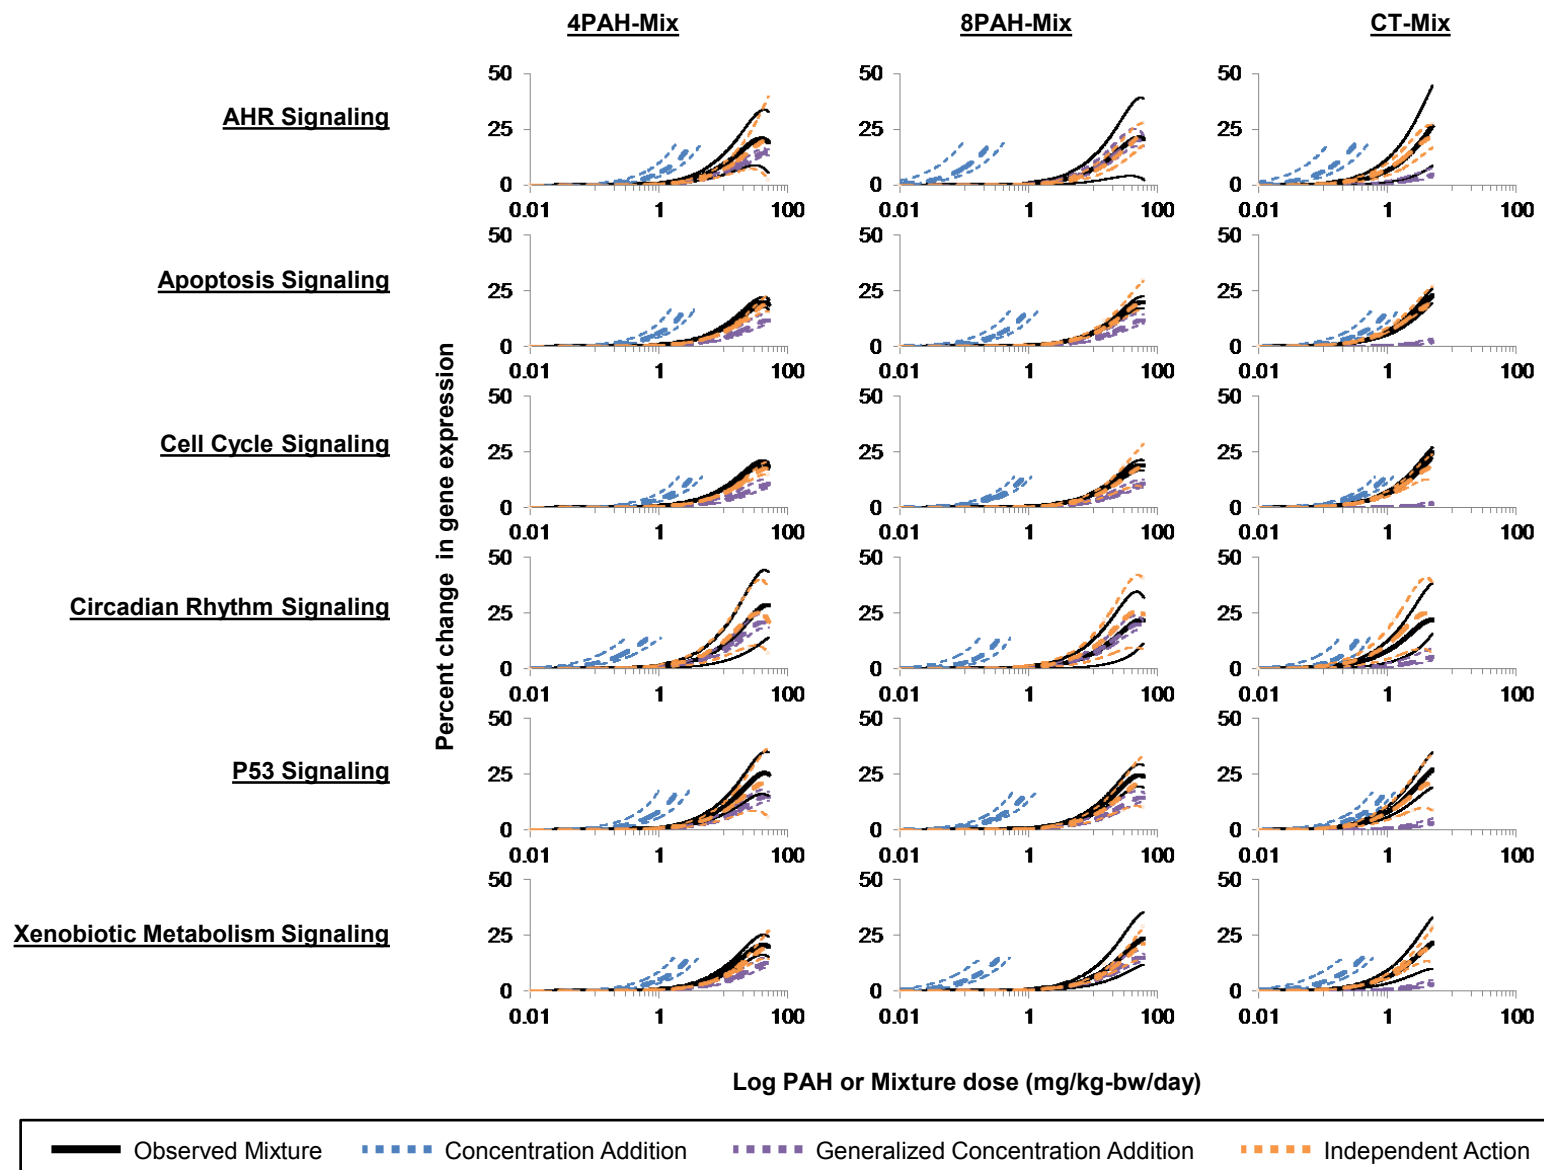

Supplement: 204_2016_1891_MOESM5_ESM.pdf [file 204_2016_1891_MOESM5_ESM.pdf]
